# Supplementary material
Source: publisher site journal article supplement (https://www.dovepress.com/article/454277)
Supplement: Supplementary file 1 [file get_supplementary_file.php]

**Supplementary Material**

**Supplementary Figure 1. GDF15-EVs ameliorated myocardial hypertrophy after myocardial infarction.** **(A)** The ratio of left ventricular weight to tibial length (LVW/TIBIA) in different groups at 28 days post-AMI. *P<0.05, **P<0.01.


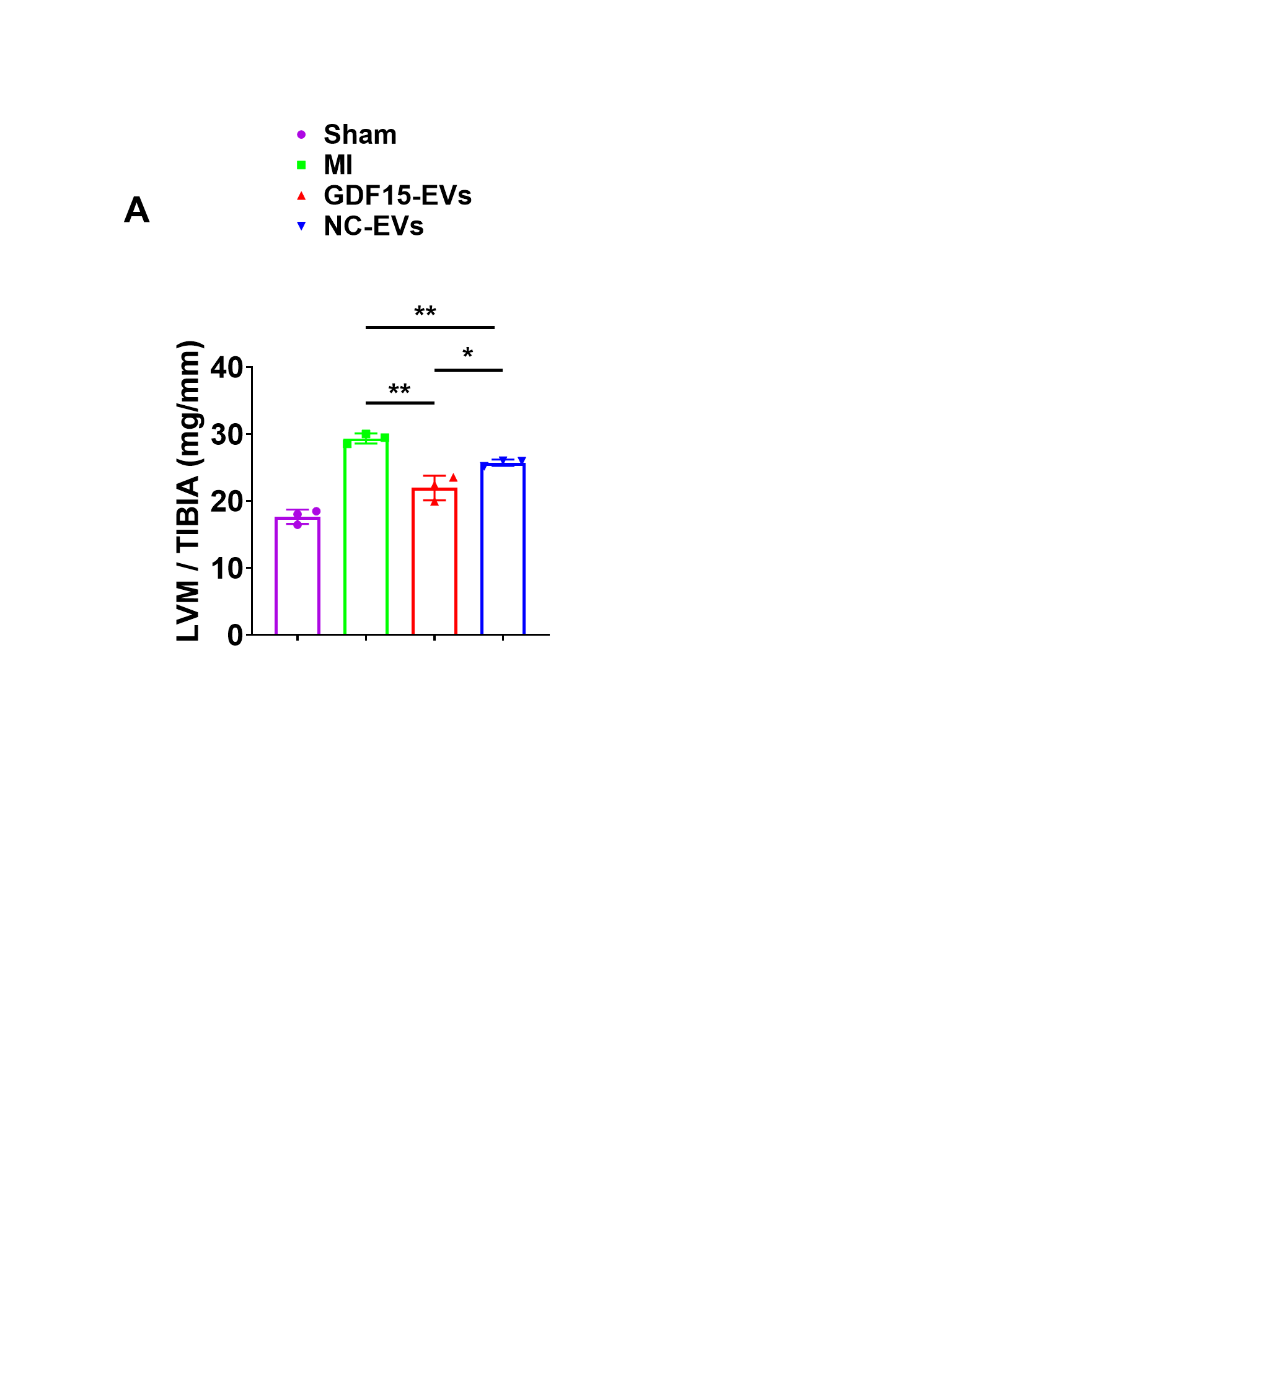


**Supplementary Figure 2. GDF15-EVs** **attenuated inflammation and reduced apoptosis after myocardial infarction.** **(A)** Representative images of immunohistochemistry analysis for NLRP3 expression at 28 days in different groups and **(B)** quantification analysis of AOD (n=3) (Scale bar =20 μm). **(C)** Representative images of immunohistochemistry analysis for Cleaved-caspase3 expression at 28 days in different groups and **(D)** quantification analysis of AOD (n=3) (Scale bar =20 μm). Data are shown as the mean ±SEM. **P < 0.01, ***p<0.001, ****p<0.0001.


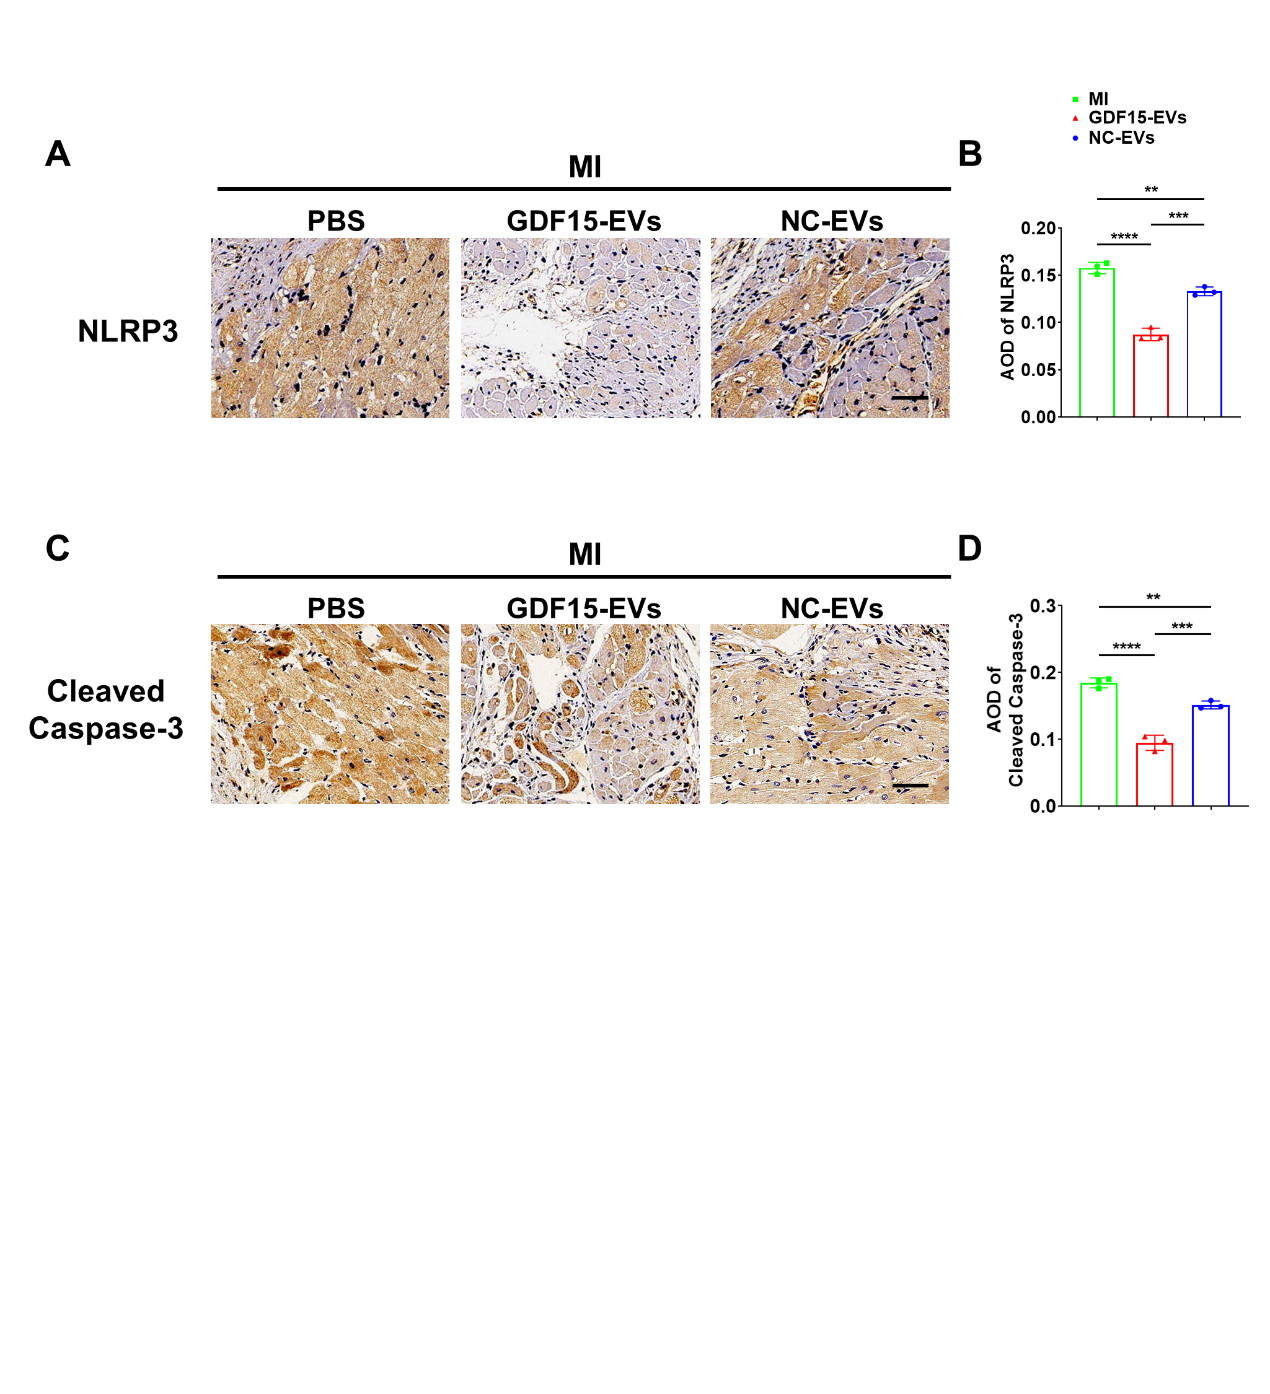


**Supplementary Table 1. Target sequence of TERT siRNA.**

| Number | Name | Target Sequence |
| --- | --- | --- |
| siG09326120644 | Si-r-Tert_001 | CCACGCAAAGTGCCAATAT |
| siG09326120658 | Si-r-Tert_002 | GCCAGCATGTTAGGAAGAA |
| siG09326120715 | Si-r-Tert_003 | CCAAACATCCTAACCTTAT |

**Supplementary Table 2. Comparison of ecocardiographic parameters in each group at 14 days after infarction**

| Paremeters | MI(PBS) | NC-EVs | GDF15-EVs | Sham |
| --- | --- | --- | --- | --- |
| Heart Rate (bpm) | 390.10±12.78 | 363.58±13.41 | 351.17±14.33 | 365.56±10.5 |
| LVDs (mm) | 6.75±0.21 | 5.94±0.08* | 4.90±0.13*** | 3.29±0.08*** |
| LVDd (mm) | 8.68±0.37 | 7.04±0.34 | 7.54±0.27 | 6.49±0.20*** |
| LVAWs (mm) | 0.98±0.17 | 2.17±0.19 | 3.16±0.12*** | 3.18±0.64*** |
| LVAWd (mm) | 0.74±0.32 | 0.74±0.29 | 1.66±0.38* | 1.86±0.35* |
| LVPWs (mm) | 2.21±0.16 | 2.52±0.25 | 2.81±0.24 | 3.03±0.16* |
| LVPWd (mm) | 2.15±0.20 | 1.94±0.43 | 2.11±0.12 | 1.95±0.23 |

**n=3 for each group. All data are mean ± SEM. Statistical analysis was performed with one-way ANOVA followed by the Tukey's test. *P<0.05, ***P<0.001 compared with PBS group. bpm: beat per minute; LVDs: left ventricular end systolic diameter; LVDd: left ventricular end diastolic diameter; LVAWs：left ventricular anterior wall end-systolic dimension； LVAWd：left ventricular anterior wall diastolic dimension；LVPWs: left ventricular posterior wall thickness at end-systole; LVPWd: Left ventricular posterior wall thickness at end diastolic.**

**Supplementary Table3. Comparison of ecocardiographic parameters in each group at 28 days after infarction**

| Paremeters | MI(PBS) | NC-EVs | GDF15-EVs | Sham |
| --- | --- | --- | --- | --- |
| Heart Rate (bpm) | 359.04±14.69 | 357.91±13.54 | 353.04±9.8 | 334.46±10.30 |
| LVDs (mm) | 7.09±0.12 | 6.35±0.16* | 5.34±0.18** | 4.07±0.14*** |
| LVDd (mm) | 9.73±0.55 | 8.92±0.51 | 8.39±0.25* | 7.43±0.87*** |
| LVAWs (mm) | 0.69±0.30 | 1.68±0.19* | 2.62±0.31*** | 3.31±0.64*** |
| LVAWd (mm) | 1.17±0.49 | 1.51±0.43 | 1.81±0.89* | 1.97±0.10* |
| LVPWs (mm) | 2.47±0.54 | 2.62±0.24 | 2.91±0.48* | 3.23±0.56* |
| LVPWd (mm) | 1.66±0.17 | 1.70±0.34 | 1.84±0.39 | 1.83±0.27 |

**n=3 for each group. All data are mean ± SEM. Statistical analysis was performed with one-way ANOVA followed by the Tukey's test. *P<0.05, **P<0.01, ***P<0.001 compared with PBS group. bpm: beat per minute; LVDs: left ventricular end systolic diameter; LVDd: left ventricular end diastolic diameter; LVAWs：left ventricular anterior wall end-systolic dimension； LVAWd：left ventricular anterior wall diastolic dimension；LVPWs: left ventricular posterior wall thickness at end-systole; LVPWd: Left ventricular posterior wall thickness at end diastolic.**
